# Supplementary material for: Preliminary Studies on the Effects of Oyster Mushroom Spherical Virus China Strain on the Mycelial Growth and Fruiting Body Yield of the Edible Mushroom Pleurotus ostreatus
Source: MDPI journal article supplement (doi:10.3390/biology11040574), 2022-04-10
Supplement: s1 [file s1]

**Table S1.** Sequences of primers used in this study.

| Primer     | Sequence (5'-3')               | Note                                               |
|------------|--------------------------------|----------------------------------------------------|
| OMSV-CPF   | ATGTCTACTCCTACCCCCCAGGA        | RT-PCR detection for OMSV [14]                     |
| OMSV-CPR   | TCATATGACGCCGTATCCAAGTCC       |                                                    |
| OMSV-4959F | TACCCCCCAGGATCTCAAGCTTCT       | RT-PCR detection for OMSV-Ch<br>(Newly design)     |
| OMSV-5605R | TGAAAGCGCGTCCATCAGAACCATTC     |                                                    |
| OMSV-5F    | CGTTGCTCACTGTGTCCCACTGCTCCCGGC | RT-PCR amplification for OMSV-Ch<br>(Newly design) |
| OMSV-2888R | AGACCGCCGCAACTGGAAAA           |                                                    |
| OMSV-2821F | GTCACGGCGCAGAACGCACG           | RT-PCR amplification for OMSV-Ch<br>(Newly design) |
| OMSV-3R    | ATGTAAACCATATACCAAAC           |                                                    |
| OMIV-1F    | AACATTGTTGATCACGCTCT           | RT-PCR detection for OMIV<br>(Newly design)        |
| OMIV-1R    | GGCTTCAGAATAAAGATTGT           |                                                    |
| PV-RDRPF   | CCNNTNCAYTTTRYNGA              | RT-PCR detection for PoV-ASI2792 [23]              |
| PV-RDRPR   | SWRTCARNRNSWYTGNGT             |                                                    |
| SN-F       | ATAGAATTCAAAAATACTTGTCATCCC    | RT-PCR detection for PoV-SN [24]                   |
| SN-R       | ATAGAATTCCTAAACAAATAGACGTTG    |                                                    |
| POSV-1F    | AAACTCCTTGGTGCCCTCAA           | RT-PCR detection for POSV<br>(Newly design)        |
| POSV-1R    | ATTGTGAAAAAAGACTTGTA           |                                                    |
| PoV1-F     | ATCAAATCTTCCCTCTCCGA           | RT-PCR detection for PoV1<br>(Newly design)        |
| PoV1-R     | CGGTAGGTATTGCGGATATT           |                                                    |
| actin-F    | AGTCGGTGCCTTGTTAT              | RT-qPCR detection for actin gene [28]              |
| actin-R    | ATACCGACCATCACACCT             |                                                    |

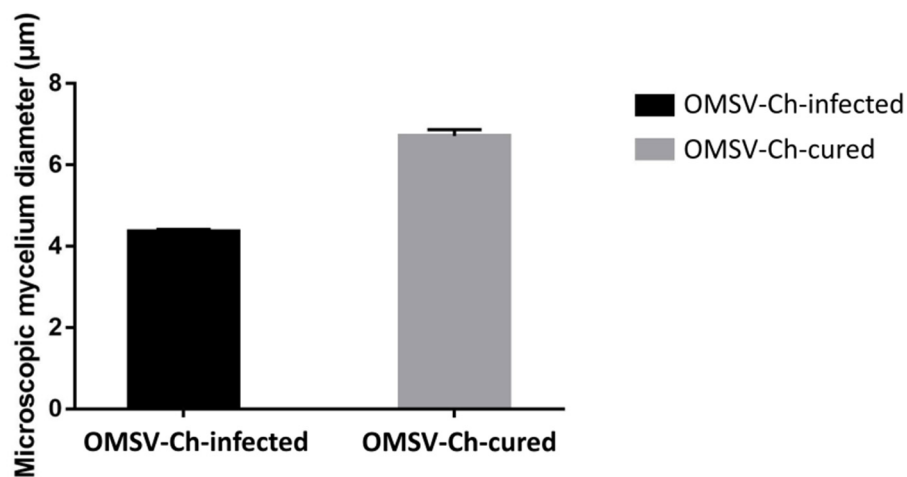**Figure S1.** Microscopic observation of the mycelium diameters the OMSV-Ch-infected and OMSV-Ch-cured *P. ostreatus* strains. Statistical analysis was performed using Student's *t* test.
